# Supplementary material for: Misleading Westerns: Common Quantification Mistakes in Western Blot Densitometry and Proposed Corrective Measures
Source: Biomed Res Int. 2019 Jan 21;2019:5214821. doi: 10.1155/2019/5214821 (PMC6360618; doi:10.1155/2019/5214821)
Supplement: Supplementary 1 — Supplementary Table S1: This file contains details on the antibodies used in this study including supplier details, catalogue and lot numbers, the dilution of each antibody that was used, membrane blocking conditions, and antibody incubation conditions. [file 5214821.f1.xlsx]

## Sheet: Sheet1
Antibody	Antibody Abbreviation	Supplier	Catalogue Number	Lot Number	Host Species and Antibody Isotype	Antibody Dilution Used	Membrane Blocking Conditions For Chemiluminescence (All in TBST)	Antibody Incubation Buffer for Membranes Developed Using Chemiluminesce (All in TBST)
Alpha-Smooth Muscle Actin	αSMA	Sigma Aldrich	A5228	074M418V and 110M4795 (lot number 110M4795 was used in membranes used for Figure 1, lot 074M418V was used in membranes used for Figures 2 and 3)	Mouse Immunoglobulin G	1/10000 (Figures 1 and 2) and 1/100000 (Figure 3)	5% Milk Powder	5% Milk Powder
Myosin Phosphatse Targeting Subunit 1	MYPT1	Cell Signaling Technologies	8574	1	Rabbit Immunoglobulin G	1/1000	5% Milk Powder	5% Bovine Serum Albumin
Extracellular Signal-Regulated Kinases 1/2	ERK1/2	Cell Signaling Technologies	9102	26	Rabbit Immunoglobulin G	1/1000	5% Milk Powder	5% Bovine Serum Albumin
Smooth Muscle Myosin Regulatory Light Chain 20	MLC-20	Sigma Aldrich	SAB4500138	210690	Rabbit Immunoglobulin G	1/1000	5% Milk Powder	5% Bovine Serum Albumin
Alpha-Actinin	αActinin	Cell Signaling Technologies	6487	1	Rabbit Immunoglobulin G	1/1000	5% Milk Powder	5% Milk Powder
Rho-Associated Protein Kinase 1	ROCK1	Abcam	Ab58305	GR146426-10	Mouse Immunoglobulin G	1/1000	5% Milk Powder	5% Bovine Serum Albumin
Glyceraldehyde 3-Phosphate Dehydrogenase	GAPDH	Cell Signaling Technologies	5174	6	Rabbit Immunoglobulin G	1/1000	5% Milk Powder	5% Milk Powder
Cofilin	Cofilin	Santa Cruz Biotechnology	SC-33779	F0407	Rabbit Immunoglobulin G	1/1000	5% Milk Powder	5% Milk Powder
Heat Shock Protein 27	HSP27	Abcam	Ab2790	GR185659-7	Mouse Immunoglobulin G	1/5000	5% Milk Powder	5% Milk Powder
Ras Homolog Gene Family, Member A	RhoA	Cell Signaling Technologies	2117	3	Rabbit Immunoglobulin G	1/1000	5% Milk Powder	5% Bovine Serum Albumin
Anti-6x His Tag	N/A	Abcam	Ab18184	2578271	Mouse Immunoglobulin G	1/1000	5% Milk Powder	5% Milk Powder
Anti-Rabbit Immunoglubulin G HRP-Conjugate (Secondary Antibody-Chemiluminescence Detection)	N/A	Cell Signaling Technologies	7074	26	Goat	1/2500	5% Milk Powder	5% Milk Powder
Anti-Mouse Immunoglubulin G HRP-Conjugate (Secondary Antibody-Chemiluminescence Detection)	N/A	Cell Signaling Technologies	7076	31 and 27 (Lot Number 27 was used on membranes used for Figure 3)	Horse	1/2500	5% Milk Powder	5% Milk Powder
Anit-Rabbit Immungolbulin G IRDye-800CW (Secondary Antibody-Infrared Fluorescence Detection)	N/A	Li-COR Biosciences	926-32213	C40130-03	Donkey	1/15000	OBB	OBB with 0.2% Tween-20
Anit-Mouse Immungolbulin G IRDye-800CW (Secondary Antibody-Infrared Fluorescence Detection)	N/A	Li-COR Biosciences	926-32210	C50113-06 (This antibody was used on membranes used for Figures 2 and 4)	Goat	1/15000	OBB	OBB with 0.2% Tween-20
Anit-Mouse Immungolbulin G IRDye-700RD (Secondary Antibody-Infrared Fluorescence Detection)	N/A	Li-COR Biosciences	926-687072	C31002-04 (This antibody was used on membranes used for Figure 1)	Donkey	1/15000	OBB	OBB with 0.2% Tween-20
