# Supplementary material for: Misleading Westerns: Common Quantification Mistakes in Western Blot Densitometry and Proposed Corrective Measures
Source: Biomed Res Int. 2019 Jan 21;2019:5214821. doi: 10.1155/2019/5214821 (PMC6360618; doi:10.1155/2019/5214821)
Supplement: Supplementary 3 — Supplementary Table S2: This file contains the raw densitometry data and normalised data that was used in this study. [file 5214821.f3.xlsx]

## Sheet: Figure 1 Data
	Chemiluminescence					Infrared Fluorescence
	Nitrocellulose Membranes O.D. Data Figure 1B					Nitrocellulose Membranes O.D. Data Figure 1D
	Protein Amount (μg)	Membrane 1	Membrane 2	Membrane 3		Protein Amount (μg)	Membrane 1	Membrane 2	Membrane 3
	40	926269	1655690	1565411		40	719000	747000	718000
	20	1108907	2333988	1960577		20	628000	489000	557000
	10	1417955	1603682	1664060		10	523000	354000	495000
	5	1059873	1153964	1097622		5	383000	349000	397000
	2.5	819342	915399	1465647		2.5	299000	243000	319000
	1.25	1147265	646400	1250772		1.25	235000	200000	180000
	0.625	813750	744169	1292045		0.625	132000	127000	86700
	0.3125	385993	481960	848279		0.3125	33900	50900	40900
	0.15625	167853	209828	379414		0.15625	2490	6780	7020
	0.078125	26760.9	35861.1	60358.2		0.078125		969	1200
	0.0390625	7261.63	6093.48	29836.6		0.0390625			148
	PVDF Membranes O.D. Data Figure 1C					PVDF Membranes O.D. Data Figure 1E
	Protein Amount (μg)	Membrane 1	Membrane 2	Membrane 3		Protein Amount (μg)	Membrane 1	Membrane 2	Membrane 3
	40	758813	597772	655347		40	738000	439000	339000
	20	781818	600359	734446		20	622000	376000	352000
	10	790818	554395	657371		10	503000	310000	344000
	5	649511	505906	454250		5	395000	231000	270000
	2.5	566120	465283	440545		2.5	315000	185000	211000
	1.25	523567	319386	459846		1.25	256000	139000	156000
	0.625	500189	281166	395165		0.625	171000	97300	126000
	0.3125	362115	243824	399099		0.3125	87700	58100	73500
	0.15625	184539	114837	255506		0.15625	29600	32100	46400
	0.078125	53849.9	40088.7	132390		0.078125	6690	6760	19700
	0.0390625	7354.22	11044	45920.2		0.0390625		712	6430
	Nitrocellulose Intensity Only Supplementary Figure 1
	Protein Amount (μg)	Membrane 1	Membrane 2	Membrane 3
	40	67870810	103060200	97440670
	20	75925820	138809600	105823400
	10	69341720	84956770	86357900
	5	58095840	54292440	55422550
	2.5	41168730	46619980	51644660
	1.25	29963400	33847720	42957380
	0.625	18419170	17376090	35036110
	0.3125	7056755	9026192	20358620
	0.15625	2411119	3462858	8145550
	0.078125	425393	559836	1439184
	0.0390625	88505	76920	516133
	Nitrocellulose Band Area Only Supplementary Figure 1
	Protein Amount (μg)	Membrane 1	Membrane 2	Membrane 3
	40	73.27	62.25	62.25
	20	68.47	59.47	53.98
	10	48.9	52.98	51.9
	5	54.81	47.05	50.49
	2.5	50.25	50.93	35.24
	1.25	26.12	52.36	34.34
	0.625	22.63	23.35	27.12
	0.3125	18.28	18.73	24
	0.15625	14.36	16.5	21.47
	0.078125	15.9	15.61	23.84
	0.0390625	12.19	12.62	17.3
	PVDF Intensity Only Supplementary Figure 1
	Protein Amount (μg)	Membrane 1	Membrane 2	Membrane 3
	40	37801180	30472590	46727000
	20	30661990	29652710	40593340
	10	30317990	25577070	37414370
	5	23685990	21260190	27101080
	2.5	23483350	15999990	19450990
	1.25	19850000	12067660	19324600
	0.625	18006750	8272528	14981880
	0.3125	11743980	5655213	13672610
	0.15625	4337673	3060330	9453563
	0.078125	1312651	843636	3976316
	0.0390625	80030	149027	859504
	PVDF Band Area Only Supplementary Figure 1
	Protein Amount (μg)	Membrane 1	Membrane 2	Membrane 3
	40	49.82	50.98	71.3
	20	39.22	49.39	55.27
	10	38.34	46.14	56.92
	5	36.47	42.02	59.66
	2.5	41.48	34.39	44.15
	1.25	37.91	37.78	42.02
	0.625	36	29.42	37.91
	0.3125	32.43	23.19	34.26
	0.15625	23.51	26.65	37
	0.078125	24.38	21.04	30.03
	0.0390625	10.88	13.49	18.72

## Sheet: Figure 2 Data
	Chemiluminescence					Infrared Fluorescence
	MYPT1 O.D. Data					MYPT1 O.D. Data
	Protein Amount (μg)	Membrane 1	Membrane 2			Protein Amount (μg)	Membrane 1	Membrane 2
	40	8224.62	3936.13			40	5710000	2390000
	20	5091.7	2116.83			20	1880000	765000
	10	2112.39	567.94			10	588000	310000
	5	453.06	208.52			5	150000	130000
	2.5	85.61	73.41			2.5	55200	57600
	1.25	20.07				1.25	19900	22300
	0.625					0.625	4470	9620
	0.3125					0.3125		5690
	0.15625					0.15625		961
	ERK1/2 O.D. Data					ERK1/2 O.D. Data
	Protein Amount (μg)	Membrane 1	Membrane 2			Protein Amount (μg)	Membrane 1	Membrane 2
	40	15544.8	15181.4			40	12100000	7430000
	20	14486.4	12575.2			20	8400000	4990000
	10	7777.67	7422.99			10	4920000	3280000
	5	3555.74	3037.77			5	2450000	1700000
	2.5	1048.35	1321.58			2.5	1080000	732000
	1.25	320.26	356.82			1.25	444000	275000
	0.625	69.79	69.3			0.625	178000	103000
	0.3125					0.3125	72300	29700
	0.15625					0.15625	23000	7460
	MLC20 O.D. Data					MLC20 O.D. Data
	Protein Amount (μg)	Membrane 1	Membrane 2			Protein Amount (μg)	Membrane 1	Membane 2
	40	3368.98	9408.71			40	388000	721000
	20	1465.92	4600.59			20	104000	287000
	10	317.85	1371.84			10	48000	116000
	5	127.78	265.56			5	24200	58500
	2.5					2.5	14500	23300
	1.25					1.25
	0.625					0.625
	0.3125					0.3125
	0.15625					0.15625
	ROCK1 O.D. Data					ROCK1 O.D. Data
	Protein Amount (μg)	Membrane 1	Membrane 2			Protein Amount (μg)	Membrane 1	Membane 2
	40	4031.85	8241.77			40	1370000	1750000
	20	2644.09	6566.65			20	687000	657000
	10	933.9	3856.53			10	198000	294000
	5	341.53	1688.67			5	96600	90500
	2.5		276.38			2.5	31800	47700
	1.25		57.22			1.25	8180	11800
	0.625					0.625
	0.3125					0.3125
	0.15625					0.15625
	αSMA O.D. Data					αSMA O.D. Data
	Protein Amount (μg)	Membrane 1	Membrane 2			Protein Amount (μg)	Membrane 1	Membane 2
	40	20030.9	16672.1			40	13600000	11700000
	20	19527.8	16401.6			20	10300000	7240000
	10	17771.9	12611.6			10	6930000	7120000
	5	19616.8	9247.62			5	5820000	6270000
	2.5	14444.5	8957.53			2.5	4360000	4400000
	1.25	9967.79	7213.78			1.25	3480000	3470000
	0.63	7934.42	8454.25			0.625	2610000	2400000
	0.31	4664.48	5593			0.3125	1710000	1320000
	0.16	987.22	1511.11			0.15625	316000	311000
	HSP27 O.D. Data					HSP27 O.D. Data
	Protein Amount (μg)	Membrane 1	Membrane 2			Protein Amount (μg)	Membrane 1	Membrane 2
	40	6223.99	11355.2			40	5630000	4230000
	20	5521.54	11625.4			20	4640000	4130000
	10	3919.04	9800.06			10	4640000	3210000
	5	3375.05	6059.92			5	3870000	2240000
	2.5	2185.67	4108.37			2.5	2850000	1150000
	1.25	1524.12	2277.65			1.25	1560000	816000
	0.63	488.31				0.625	609000	216000
	0.31	135.32				0.3125	191000	23400
	0.16	25.69				0.15625	24600	15300
	αActinin O.D. Data					αActinin O.D. Data
	Protein Amount (μg)	Membrane 1	Membrane 2			Protein Amount (μg)	Membrane 1	Membrane 2
	40	13218.9	7782.94			40	5600000	9190000
	20	14618.7	6530.61			20	4260000	7270000
	10	13100	5106.66			10	3180000	5040000
	5	11604.7	4910.53			5	2290000	2670000
	2.5	8962.84	4377.31			2.5	1200000	1590000
	1.25	5574.44	2716.11			1.25	510000	584000
	0.63	3316.93	1627.71			0.625	135000	173000
	0.31	1244.96	520.46			0.3125	23200	31300
	0.16	139.33	101.04			0.15625	3280	4810
	GAPDH O.D. Data					GAPDH O.D. Data
	Protein Amount (μg)	Membrane 1	Membrane 2			Protein Amount (μg)	Membrane 1	Membrane 2
	40	9600.65	13123.9			40	2820000	3400000
	20	8920.5	10240			20	1740000	2810000
	10	5003.48	7461.15			10	842000	1750000
	5	1857.89	3607.95			5	113000	560000
	2.5	512.27	950.39			2.5	6820	72100
	1.25	43.57	145.07			1.25	1330	3310
	0.63		11.41			0.625	186
	0.31					0.3125
	0.16					0.15625
	Cofilin O.D. Data					Cofilin O.D. Data
	Protein Amount (μg)	Membrane 1	Membrane 2			Protein Amount (μg)	Membrane 1	Membrane 2
	40	6105.61	11026.7			40	4870000	5970000
	20	3796.99	8653.91			20	3550000	4450000
	10	1516.98	3879.63			10	2210000	2700000
	5	735.4	1605.75			5	1120000	1340000
	2.5	235.06	608.92			2.5	679000	712000
	1.25	59.78	132.45			1.25	366000	320000
	0.63	18.08	26.37			0.625	181000	161000
	0.31					0.3125	70700	77500
	0.16					0.15625	28900	33100

## Sheet: Figure 3 Data
	Non-Laboring						Laboring
Figure 4A	MYPT1 O.D. Data						MYPT1 O.D. Data
Protein Amount (μg)	Membrane 1	Membrane 2	Membrane 3	Membrane 4	Membrane 5	Protein Amount (μg)	Membrane 1	Membrane 2	Membrane 3	Membrane 4	Membrane 5
40	9697	6050	6657	7155	7183	40	11788	3718	3957	6779	4180
20	6318	4498	4373	3259	3388	20	6074	4507	1867	4833	1070
10	4947	3601	2662	3298	986	10	3916	2417	887	4017	419
5	4990	2742	2640	1969	558	5	3056	2817	589	2984	238
2.5	2975	1855	2138	424	625	2.5	2824	1339	487	2138	142
Figure 4B	αSMA O.D. Data						αSMA O.D. Data
Protein Amount (μg)	Membrane 1	Membrane 2	Membrane 3	Membrane 4	Membrane 5	Protein Amount (μg)	Membrane 1	Membrane 2	Membrane 3	Membrane 4	Membrane 5
40	17370.2	15916.4	20131.7	17189.8	11909.2	40	20274.1	10561.7	11051.6	14195.2	8302.07
20	16659.5	16156.2	20808.8	13306.3	10897.5	20	13558.2	12861	14954.4	13629.9	8698.95
10	16625.3	15522.7	23307.6	10985.5	10350.4	10	15325.4	13776.9	13127.2	12350	8422.43
5	17392.6	12365.8	18650.6	11720.5	10399.4	5	16309.5	11797.3	9794.93	11025.5	8211.97
2.5	18535.3	8524.82	12614.4	12758.7	10062.1	2.5	19278.5	9738.61	5625.24	11957.7	6310.69
Figure 4C	RhoA O.D. Data						RhoA O.D. Data
Protein Amount (μg)	Membrane 1	Membrane 2	Membrane 3	Membrane 4	Membrane 5	Protein Amount (μg)	Membrane 1	Membrane 2	Membrane 3	Membrane 4	Membrane 5
40	4363.69	7726.16	10894.2	10528	7543.68	40	11313.7	5807.74	8051.03	9443.17	6868.1
20	1663.08	3065.07	5318.45	3484.89	2187.66	20	2018.46	2371.93	4548.76	2817.74	1119.12
10	308.52	1012.78	1922.86	1076.85		10	736.03	602.78	1423.57	808.35
5	48.67	484.15	709.62			5	145.31	167.53	411.09
2.5		46.47	157.34			2.5		63.32	79.23
Figure 4D	Ponceau S O.D. Data						Ponceau S O.D. Data
Protein Amount (μg)	Membrane 1	Membrane 2	Membrane 3	Membrane 4	Membrane 5	Protein Amount (μg)	Membrane 1	Membrane 2	Membrane 3	Membrane 4	Membrane 5
40	6951	7022	7381	6539	8023	40	8064	5852	7453	6055	7569
20	3209	4235	5477	3313	5371	20	4082	4346	4865	4023	4373
10	2425	2173	3070	1950	2763	10	2334	2211	2773	2338	2272
5	1864	1280	1915	1102	1493	5	2130	1065	1506	1295	1502
2.5	976	638	1026	561	1072	2.5	1086	727	614	745	1059
Figure 4E	RhoA Normalized To Ponceau S						RhoA Normalized To Ponceau S
Protein Amount (μg)	Membrane 1	Membrane 2	Membrane 3	Membrane 4	Membrane 5	Protein Amount (μg)	Membrane 1	Membrane 2	Membrane 3	Membrane 4	Membrane 5
40	0.627779	1.10028	1.47597	1.61004	0.940257	40	1.40299	0.992437	1.08024	1.55957	0.907399
20	0.518255	0.723747	0.971052	1.05188	0.40731	20	0.494478	0.545773	0.934997	0.700408	0.255916
10	0.127225	0.466075	0.626339	0.552231		10	0.315351	0.272628	0.513368	0.345744
5	0.0261105	0.378242	0.370559			5	0.0682207	0.157305	0.272968
2.5		0.072837	0.153353			2.5		0.0870977	0.129039
Figure 4F	MYPT1 Normalized To Ponceau S						MYPT1 Normalized To Ponceau S
Protein Amount (μg)	Membrane 1	Membrane 2	Membrane 3	Membrane 4	Membrane 5	Protein Amount (μg)	Membrane 1	Membrane 2	Membrane 3	Membrane 4	Membrane 5
40	1.39505	0.861578	0.90191	1.0942	0.895301	40	1.46181	0.635338	0.530927	1.11957	0.552253
20	1.96884	1.0621	0.79843	0.983701	0.630795	20	1.488	1.03705	0.383762	1.20134	0.244683
10	2.04	1.65716	0.867101	1.69128	0.356858	10	1.67781	1.09317	0.31987	1.71814	0.184419
5	2.67704	2.14219	1.37859	1.78675	0.373744	5	1.43474	2.64507	0.391102	2.30425	0.158455
2.5	3.04816	2.90752	2.08382	0.755793	0.583022	2.5	2.60037	1.84182	0.79316	2.8698	0.134089
Figure 4G	αSMA Normalized To Ponceau S						αSMA Normalized To Ponceau S
Protein Amount (μg)	Membrane 1	Membrane 2	Membrane 3	Membrane 4	Membrane 5	Protein Amount (μg)	Membrane 1	Membrane 2	Membrane 3	Membrane 4	Membrane 5
40	2.49895	2.26665	2.7275	2.62882	1.48438	40	2.51415	1.8048	1.48284	2.34438	1.09685
20	5.19149	3.81493	3.79931	4.01639	2.02895	20	3.32146	2.95928	3.07387	3.38799	1.98924
10	6.85578	7.14344	7.59204	5.63356	3.74606	10	6.56617	6.23105	4.73392	5.28227	3.70706
5	9.33082	9.66077	9.7392	10.6357	6.96543	5	7.65703	11.0773	6.50394	8.51392	5.46736
2.5	18.9911	13.3618	12.2948	22.7428	9.38629	2.5	17.7518	13.3956	9.16163	16.0506	5.9591
Figure 4H	RhoA Normalized to αSMA						RhoA Normalized to αSMA
Protein Amount (μg)	Membrane 1	Membrane 2	Membrane 3	Membrane 4	Membrane 5	Protein Amount (μg)	Membrane 1	Membrane 2	Membrane 3	Membrane 4	Membrane 5
40	0.251217	0.48542	0.541144	0.612458	0.633432	40	0.558037	0.549888	0.728496	0.665236	0.827276
20	0.0998278	0.189714	0.255586	0.261898	0.200749	20	0.148874	0.184428	0.304175	0.206732	0.12865
10	0.0185573	0.0652451	0.0824994	0.0980251		10	0.0480267	0.0437531	0.108445	0.0654537
5	0.00279831	0.0391524	0.0380482			5	0.00890955	0.0142007	0.0419697
2.5		0.00545114	0.012473			2.5	0	0.00650195	0.0140847
Figure 4I	MYPT1 Normalized to αSMA						MYPT1 Normalized to αSMA
Protein Amount (μg)	Membrane 1	Membrane 2	Membrane 3	Membrane 4	Membrane 5	Protein Amount (μg)	Membrane 1	Membrane 2	Membrane 3	Membrane 4	Membrane 5
40	0.558256	0.38011	0.330672	0.416234	0.603147	40	0.581431	0.352027	0.358049	0.477555	0.503489
20	0.379243	0.278407	0.210151	0.244921	0.310898	20	0.447994	0.350438	0.124846	0.354588	0.123003
10	0.297559	0.231983	0.114212	0.300215	0.0952625	10	0.255523	0.175439	0.0675698	0.325264	0.0497481
5	0.286903	0.221741	0.141551	0.167996	0.053657	5	0.187376	0.238783	0.0601332	0.270645	0.0289821
2.5	0.160505	0.2176	0.169488	0.0332321	0.0621143	2.5	0.146485	0.137494	0.0865741	0.178796	0.0225015
Figure 4J	RhoA Normalized to MYPT1						MYPT1 Normalized to αSMA
Protein Amount (μg)	Membrane 1	Membrane 2	Membrane 3	Membrane 4	Membrane 5	Protein Amount (μg)	Membrane 1	Membrane 2	Membrane 3	Membrane 4	Membrane 5
40	0.450004	1.27705	1.6365	1.47143	1.05021	40	0.959766	1.56206	2.03463	1.393	1.64309
20	0.263229	0.68143	1.2162	1.06931	0.645708	20	0.332311	0.526277	2.4364	0.583021	1.04591
10	0.0623651	0.28125	0.722337	0.326516		10	0.187955	0.249392	1.60493	0.201232
5	0.00975351	0.176568	0.268795			5	0.0475491	0.0594711	0.697946
2.5		0.0250512	0.0735921			2.5		0.047289	0.16269

## Sheet:  Figure 4 Data
	Chemiluminescence					Infrared Fluorescence
Spiked Protein Amount (ng)	Membrane 1	Membrane 2	Membrane 3		Spiked Protein Amount (ng)	Membrane 1	Membrane 2	Membrane 3
	ENPP1 O.D. Data					ENPP1 O.D. Data
15.625	10800000	10100000	9540000		15.625	41200	51400	72700
31.25	27000000	17600000	19200000		31.25	152000	118000	203000
62.5	36100000	25400000	27000000		62.5	277000	132000	350000
125	48100000	32600000	36300000		125	452000	364000	520000
250	65600000	39900000	56200000		250	603000	621000	696000
500	79300000	50800000	74600000		500	724000	674000	789000
1000	90600000	70500000	96900000		1000	736000	878000	784000
2000	126000000	96600000	138000000		2000	1160000	1370000	1570000
Spiked Protein Amount (ng)	Fam3a O.D. Data				Spiked Protein Amount (ng)	Fam3a O.D. Data
15.625	2310000	1120000	1680000		15.625	11200	11100	13100
31.25	6110000	4460000	3740000		31.25	30200	22000	26600
62.5	11300000	9470000	6520000		62.5	62500	67800	64800
125	16100000	14900000	11300000		125	116000	152000	131000
250	20200000	19500000	14400000		250	193000	136000	202000
500	25500000	26600000	20200000		500	253000	330000	320000
1000	27600000	36000000	24400000		1000	264000	416000	399000
2000	42100000	53300000	38600000		2000	534000	580000	628000
Spiked Protein Amount (ng)	Ponceau S O.D. Data				Spiked Protein Amount (ng)	Ponceau S O.D. Data
15.625	1942.52	1884.16	2244.55		15.625	2199.46	2461.48	2624.74
31.25	1799.3	1847.75	2195.28		31.25	1864.13	1852.28	1719.32
62.5	1841.21	1995.46	2096.26		62.5	1877.79	2179.63	1751.45
125	2025.98	2116.83	1951.03		125	2032.19	1851.6	1747.17
250	2052.91	2055	2152.79		250	2212.81	1789.68	2142.81
500	2093.16	1998.74	2025.31		500	2228.26	1742.62	1921.15
1000	2042.81	1933.22	2066.16		1000	2089.81	1722.12	1741.88
2000	1893.77	1629.91	1589.15		2000	1781.93	1413.68	1564.14
Spiked Protein Amount (ng)	ENPP1 Normalised to Fam3a				Spiked Protein Amount (ng)	ENPP1 Normalised to Fam3a
15.625	4.67532	9.01786	5.67857		15.625	3.67857	4.63063	5.54962
31.25	4.41899	3.94619	5.13369		31.25	5.03311	5.36364	7.63158
62.5	3.19469	2.68215	4.1411		62.5	4.432	1.9469	5.40123
125	2.98758	2.18792	3.21239		125	3.89655	2.39474	3.96947
250	3.24752	2.04615	3.90278		250	3.12435	4.56618	3.44554
500	3.1098	1.90977	3.69307		500	2.86166	2.04242	2.46563
1000	3.28261	1.95833	3.97131		1000	2.78788	2.11058	1.96491
2000	2.99287	1.81238	3.57513		2000	2.17228	2.36207	2.5
Spiked Protein Amount (ng)	Fam3a Normalised to ENPP1				Spiked Protein Amount (ng)	Fam3a Normalised to ENPP1
15.625	0.213889	0.110891	0.176101		15.625	0.271845	0.215953	0.180193
31.25	0.226296	0.253409	0.194792		31.25	0.198684	0.186441	0.131034
62.5	0.313019	0.372835	0.241481		62.5	0.225632	0.513636	0.185143
125	0.334719	0.457055	0.311295		125	0.256637	0.417582	0.251923
250	0.307927	0.488722	0.256228		250	0.320066	0.219002	0.29023
500	0.321564	0.523622	0.270777		500	0.349448	0.489614	0.405577
1000	0.304636	0.510638	0.251806		1000	0.358696	0.473804	0.508929
2000	0.334127	0.55176	0.27971		2000	0.460345	0.423358	0.4
Spiked Protein Amount (ng)	ENPP1 Normalised to Ponceau S				Spiked Protein Amount (ng)	ENPP1 Normalised to Ponceau S
15.625	5559.79	5360.48	4250.3		15.625	18.7319	20.8817	27.698
31.25	15005.8	9525.1	8746.04		31.25	81.5394	63.7053	118.07
62.5	19606.7	12728.9	12880.1		62.5	147.514	60.5607	199.834
125	23741.6	15400.4	18605.6		125	222.42	196.587	297.624
250	31954.6	19416.1	26105.7		250	272.504	346.989	324.807
500	37885.3	25416	36833.9		500	324.917	386.774	410.692
1000	44350.7	36467.7	46898.6		1000	352.185	509.837	450.088
2000	66534	59267.1	86838.9		2000	650.98	969.102	1003.75
Spiked Protein Amount (ng)	Fam3a Normalised to Ponceau S				Spiked Protein Amount (ng)	Fam3a Normalised to Ponceau S
15.625	1189.18	594.429	748.48		15.625	5.09216	4.50948	4.99097
31.25	3395.77	2413.75	1703.66		31.25	16.2006	11.8773	15.4712
62.5	6137.27	4745.77	3110.3		62.5	33.2838	31.1062	36.9979
125	7946.77	7038.83	5791.81		125	57.0813	82.0912	74.9784
250	9839.69	9489.05	6688.99		250	87.2194	75.9912	94.2687
500	12182.5	13308.4	9973.78		500	113.542	189.37	166.567
1000	13510.8	18621.8	11809.3		1000	126.327	241.563	229.063
2000	22230.8	32701.2	24289.7		2000	299.675	410.277	401.499

## Sheet: Figure 5 Data
Total Protein Labelling (Cy5 Dye)
	Amount of Protein Lysate Loaded into Gel (μg)	Estimated Amount of Spiked-in Fam3a or ENPP1 (ng)	Whole Lane O.D. Data (From Total Protein Labelling)
Standard 1	4	100	1.29561e+08
Standard 2	2	50	4.20979e+07
Standard 3	1	25	1.47869e+07
Standard 4	0.5	12.5	7.74871e+06
Standard 5	0.25	6.25	3.38747e+06
Standard 6	0.125	3.125	1.86679e+06	Interpolated Data (Model - Second Order Polynomial)(estimated in μg)
12.5 ng Spiked-in ENPP1 and Fam3a (Lane 7 )	2	12.5	3.30764e+07	1.71125
12.5 ng Spiked-in ENPP1 and Fam3a (Lane 8)	2	12.5	3.20133e+07	1.67403
50 ng Spiked-in ENPP1 and Fam3a (Lane 9)	2	50	2.9156e+07	1.57105
50 ng Spiked-in ENPP1 and Fam3a (Lane 10)	2	50	2.74003e+07	1.50544
			Average (12.5 ng Spiked-in ENPP1 and Fam3a Samples)	1.69264
			Average (50 ng Spiked-in ENPP1 and Fam3a Samples)	1.53824
			Estimated Fold-Difference	1.10037
ENPP1 O.D. Data
	Estimated Amount of Spiked-in Fam3a or ENPP1 (ng)	ENPP1 O.D. Data
Standard 1	100	6.84646e+07
Standard 2	50	3.71888e+07
Standard 3	25	20405589
Standard 4	12.5	10322547
Standard 5	6.25	3.03527e+06
Standard 6	3.125	600805
12.5 ng Spiked-in ENPP1 and Fam3a (Lane 7 )	12.5	6675069
12.5 ng Spiked-in ENPP1 and Fam3a (Lane 8)	12.5	6.09849e+06
50 ng Spiked-in ENPP1 and Fam3a (Lane 9)	50	21259018
50 ng Spiked-in ENPP1 and Fam3a (Lane 10)	50	21753152
Fam3a O.D. Data
	Estimated Amount of Spiked-in Fam3a or ENPP1 (ng)	Fam3a O.D. Data
Standard 1	100	3.10369e+07
Standard 2	50	1.3143e+07
Standard 3	25	6.88967e+06
Standard 4	12.5	2.32317e+06
Standard 5	6.25	548228
Standard 6	3.125	275551
12.5 ng Spiked-in ENPP1 and Fam3a (Lane 7 )	12.5	2019349
12.5 ng Spiked-in ENPP1 and Fam3a (Lane 8)	12.5	1.87763e+06
50 ng Spiked-in ENPP1 and Fam3a (Lane 9)	50	11967760
50 ng Spiked-in ENPP1 and Fam3a (Lane 10)	50	1.10921e+07
